# Supplementary material for: Origin of the X-chromosome influences the development and treatment outcomes of Turner syndrome
Source: PeerJ. 2021 Dec 9;9:e12354. doi: 10.7717/peerj.12354 (PMC8667718; doi:10.7717/peerj.12354)
Supplement: Supplemental Information 1 — All categorical data were expressed as frequencies and percentages; continuous data were expressed as the mean ± standard deviation (SD). SPSS software 25.0 (IBM Corp., Armonk, NY, USA) was used for statistical analysis. The Chi-Square test was used to compare frequencies in different groups, and one-way ANOVA was used to compare continuous data. [file peerj-09-12354-s001.xlsx]

## Sheet: sheet1
NO.	Month age	Father's age at birth	Father's height	Mother's age at birth	Mother's height	height	weight	BMI	Systolic blood pressure	Diastolic blood pressure	Chromosome type	Chromosome type classification	Variation comes from father or mother	GH provocation test peak	Growth hormone（IU/d/kg)	Total number of white blood cells	Neutral cells	Lymphocytes	Monocyte	Eosinophils	Alanine aminotransferase ALTUL	Asparagus AST（UL）	Total cholesterol（mmoll）	High density lipoprotein（mmoll）	Low-density lipoprotein（mmoll）	insulin（pmoll）	Free T3（pmoll）	Free T4（pmoll）	Triiodothyronine nmoll	Thyroxinenmoll	Thyroid Stimulating Hormone TSH（uIUml）	Fasting blood glucose (mmoll)	Cardiac Color Doppler Abnormal	Abnormal ECG	B-ultrasound results of urinary system (left renal pelvis separation)	Bone density Z value	Bone age difference (bone age minus actual age)	Uterine B ultrasound	Ovarian ultrasound	IGF1（ngml）	IGFBP3ugml	LHIUL	FSHIUL	E2pmoll	PRLmIU	Pnmoll	HCGMIUML	SHBGnmoll	High growth cm after 12 months of GH treatmen
B1026	125	30	171	26	160	125.3	36.5	23.2483	105	73	46，X,del（X）（q22）（18）/45，X（12）	3	2	10.1	0.15	5.12	3.01	1.02	0.9	0.11	20	27	4.22	2.04	2.78	30.1	5.67	16.44	1.99	122	4	4.98	0	0	0	1.2	-19	2	0	375	5.01	0.1	3.01	86	362	0.6	0.5	93	9.3
B1100	103	30	170	26	162	115.5	22.2	16.6414	100	64	46,X，del(X) (p11.4)	2	3	7.1	0.15	7.26	4.36	2.4	0.44	0.15	14	21	3.3	1.48	1.79	21.83	6.37	11.06	2.34	105.23	3.44	5	0	1	0	0.8	4	1	0	149	3.03	0.6	10.84	73	772.74	0.8	0.5	98	6.99
B1101	96	26	162	29	152	113.5	22.7	17.6211	125	75	45X	1	1	12	0.15	6.78	4.45	2.01	0.12	0	17	24	6.11	1.34	#NULL!	29.01	6.21	14.76	2.04	120.44	2.13	4.78	1	0	0	0.5	10	1	0	186	3.65	0.1	2.43	73	218	0.45	0.2	50.7	8.3
B1234	72	29	176	29	156	102.2	17	16.276	88	62	47，XXX(14)/45，X(76)	4	3	7.09	0.15	8.45	4.2	2.79	0.21	0.67	21	29	5.78	1.78	2.9	89.77	5.11	12.09	1.89	114.6	3.11	4.41	0	0	0	1.5	-15	1	0	167	3.6	0.1	3.05	75	367	0.19	0.5	40.55	5
B1258	139	27	177	26	157	120.5	25.7	17.6994	100	75	45，X	1	2	13.78	0.15	4.89	1.68	2.01	1.75	0.27	18	29	5.9	2.28	3.25	26.7	5.92	13.67	2.24	116	4.32	4.41	0	1	0	0.6	-7	1	0	229	4.88	25.2	133	73.4	312	0.64	1.38	30.8	6.58
B1456	66	27	173	27	159	97	16.5	17.5364	#NULL!	#NULL!	45X	1	2	4.36	0.15	5.23	3.66	1.33	0.22	0.34	11	33	4.89	1.89	3.01	26.7	5.78	11.45	1.67	116.6	4.12	3.78	0	0	0	-1.2	-6	2	0	60	3.66	0.1	1.23	93	330	0.49	0.5	101	8.12
B335	120	29	172	25	157	118	27.8	19.9655	112	71	46,X,del,(X;?)(p11.2;?),add(15)(p13)	2	2	3.89	0.15	7.03	2.01	4.78	0.1	0	12	19	4.79	1.71	2.28	40.97	5.9	13.75	2.08	96.57	2.1	4.32	0	0	0	-1.3	0	2	0	175	3.13	0.1	3.67	86	339	0.51	0.5	39.1	10.99
B654	61	27	168	27	160	96.7	14	14.9718	110	67	45，X	1	2	9.4	0.15	6.87	2.9	3.09	0.67	0.02	11	26	5.1	1.65	2.18	31	5.1	15.73	1.33	110.62	2.79	4	1	1	0	1.8	-13	2	0	36.7	1.76	0.1	2.78	82	229	0.7	0.5	78	10.7
B772	44	28	165	25	153	88.9	12.6	15.9429	87	52	46，X，i（X）（q10）（18）/45，X（12）	3	3	4.46	0.15	8.9	3.08	3.44	0.56	0.6	14	36	5.55	1.31	3.2	32.1	7.6	13.8	2.23	101.2	2.9	4.11	0	0	0	1.6	-15	2	0	63.7	2.57	0.15	3.33	89	501	0.34	0.5	67	6
B866	55	29	169	24	159	89.7	16	19.8854	89	69	46，X，del（X）（p11.2）	2	3	10.2	0.15	9.29	3.62	4.81	0.79	0.04	9	30	4.48	1.67	2.2	25.11	7.35	15.25	1.98	100.99	2.52	5.23	0	0	0	-0.2	-10	2	1	181	2.96	0.6	10.84	73	772.74	2.01	0.5	105.7	8.9
B868	93	31	171	25	158	111.5	19.5	15.685	98	67	45,XO/46，X,r（X）(82%/18%)	3	3	19.6	0.15	7.56	2.18	5.1	0.11	0.11	9	26	5.83	1.33	3.64	13	4.46	13.24	1.67	108.48	1.96	4.31	1	1	0	0.1	2	2	2	154	3.92	0.1	2.8	73.4	339	0.64	1	43.9	9.91
B873	75	29	168	25	154	102.5	19	18.0845	#NULL!	#NULL!	45，X（58）/46，X，idic（X）（P21，31）	3	3	9.8	0.15	7.12	3.23	2.01	0.7	0.66	12	34	5.09	1.66	3.12	25.33	6.98	14.44	1.98	#NULL!	1.98	5.1	0	0	0	1.2	0	2	0	67.5	1.88	0.1	2.11	73	351	0.45	0.5	40.8	6
B884	120	29	172	23	160	123.3	23.9	15.7207	100	72	45，X，t（1；5）（q32；q33）	1	2	15	0.15	5.1	2.1	2.11	0.4	0.01	15	29	4.78	1.5	3.01	15	5.1	14.33	1.88	106.77	1.99	4.44	0	0	0	0.5	-12	2	0	166	3.1	0.1	3.44	73	383	0.61	0.5	52.11	8.5
B912	111	28	168	31	153	123	24	15.8636	110	69	45，X	1	2	11.2	0.15	4.8	1.77	3.9	0.6	0.1	13	24	5.55	1.94	2.63	112	9.1	26.77	1.9	111.2	0.01	4.9	1	1	0	-2.7	-18	1	0	98	3.4	0.1	5.34	73.4	332	0.78	0.5	56.9	7.71
B918	84	28	171	26	157	105	20	18.1406	#NULL!	#NULL!	47，XXX(34)/45，X(66)	3	3	12.45	0.15	6.89	3.16	2.08	0.34	0.51	21	30	5.88	1.69	3	20.45	7.6	15.11	1.78	117.3	2.12	3.98	0	0	0	-0.1	-2	1	1	78	2.89	0.1	3.22	73	291	0.98	0.5	67	5.5
H50	79	29	169	25	156	104	19	17.5666	#NULL!	#NULL!	45，X（82）/46，X，r（X）（8）	3	2	6.56	0.15	4.89	3.89	0.5	0.32	0.22	15	37	5.22	1.78	2.72	32.61	4.78	13.45	2.01	118.34	3.51	4.22	0	0	0	0	-3	2	0	102	2.98	0.1	1.78	75	398	0.89	0.5	58.9	8.3
H53	154	26	171	28	165	131.3	26.3	15.2555	119	71	46 X del (11.2)	2	3	10.7	0.15	7.34	2.09	3.11	1.1	0.88	14	38	5.78	1.82	2.9	89.11	6.45	16.56	2.11	120.23	4.44	4.09	1	1	0	-1.2	-4	2	2	193	3.25	0.5	0.62	277	337	1.67	0.5	30.22	6.6
H54	130	29	168	26	153	118.6	23.95	17.0269	98	69	45，X	1	2	11.21	0.15	5.32	3.19	1.09	0.3	0.4	6	27	3.99	1.93	2.67	23.3	5.89	13.67	2.09	119	3.45	5.1	0	0	0	1.2	9	2	0	220	4.78	0.15	1.89	73	412	0.43	0.5	86	10.8
T1	85	29	173	30	159	109	21	17.6753	115	75	45，X	1	1	13.5	0.15	6.14	3.29	2.11	0.5	0.12	7	30	5.99	1.48	#NULL!	75	5.11	13.55	1.87	121.1	4.56	4.5	1	1	0	-1.8	-4	1	0	114	2.8	0.1	2.65	73	298	0.56	0.5	50.88	8.45
T10	111	35	172	26	160	103.7	19.7	18.3193	101	67	45，X	1	2	10.78	0.15	5.34	2.03	2.11	0.7	0.2	11	31	4.33	1.99	2.89	20.55	6.11	11.3	1.77	104.4	3.21	4.28	0	0	0	2.2	-12	2	0	105	4.09	0.1	2.11	102	376	0.43	0.5	29	6.22
T11	98	30	167	26	155	120	28	19.4444	100	70	45,X[17]/46,XX[83],分析100个细胞，17个细胞核型为45，X,少一条性染色体；83个细胞核型为46，XX，为45，X/46，XX嵌合体核型。	3	3	4.02	0.15	8.67	4.01	3.99	0.01	0.23	22	38	2.98	1.16	1.4	71.63	6.77	13.93	1.96	137.03	1.72	4.93	0	0	0	-1.3	-3	2	0	99	2.79	0.43	7.09	73	379	0.41	0.5	54	5.8
T12	79	27	169	26	158	104	18.8	17.3817	99	69	mos 45，X（17）/47，X，i(X)（q10），i（X）（q10）（1）/46,X,i(X)（q10）（32）	4	3	7.34	0.15	7.89	2.31	3.79	0.67	0.56	10	35	5.98	1.54	2.88	89.1	5.28	13.11	1.73	121.33	2.45	3.88	0	0	0	-2	-9	1	1	118	3.63	0.1	2.15	73	229	0.55	0.5	69.9	7.7
T13	85	28	171	28	154	108.4	19.8	16.8503	101	78	mos45，X（32）/46，X，i（X）（q10）（18）	3	3	9.34	0.15	6.98	3.1	2.11	0.3	0.45	16	33	5.69	1.6	2.91	67.33	6.11	14.22	2.01	119.4	3.99	3.91	1	1	0	0.7	0	1	1	142	3.7	0.1	1.56	73	499	0.5	0.5	109	5.82
T14	120	29	172	30	161	121	21.4	14.6165	95	64	46，X,i(X)(q10)（82）/45，X（18）	3	3	7.57	0.15	5.59	2.71	2.37	0.41	0.01	18	29	4.01	1.78	1.74	42.14	6.38	12.37	2.02	103.78	2.7	4.52	0	1	0	1.1	-2	1	1	#NULL!	4.98	0.1	2.64	76	309	0.78	0.5	42	5.32
T15	48	29	162	29	163	96.7	14.7	15.7204	93	56	45X(78)/46,X,r(X)(p?q?)(22)	3	1	11.8	0.2	8.89	4.53	3.88	0.41	0.06	22	41	6.01	1.58	1.78	28.8	6.18	12.76	2.14	117.44	2.6	4.3	0	0	0	-0.8	-21	1	0	78	4.36	0.1	3.11	73	206	0.56	0.5	28	9.12
T16	60	28	165	29	158	102.6	16.2	15.3894	106	73	45,X	1	1	9.99	0.15	5.62	3.01	2.13	0.43	0.05	10	27	4.79	1.55	2.73	28.6	6.59	12.19	2.47	96.21	3.57	4.48	1	1	0	-1	-4	1	0	192	5.11	0.13	2.72	73	221	0.48	0.5	64.8	8.67
T17	48	28	164	29	154	98.3	15.5	16.0407	84	63	46，X，del（X）（q24）（38）/45，X（12）	3	3	10.89	0.15	6.5	2.65	3.4	0.47	0.12	43	46	6.11	1.68	#NULL!	13.52	6.2	12.29	1.69	94.91	2.68	4.2	1	1	1	1.3	-20	2	1	111	3.7	0.1	1.48	89	363	1.01	0.5	47.5	4.87
T18	96	29	172	25	157	110.5	21.8	17.8539	111	75	45,X(34)/46,X,+mar(16)	3	2	6.9	0.2	6.12	5.65	2.56	0.89	0.01	22	36	4.23	1.24	2.53	31.79	8.06	13.64	1.87	140.64	2.64	3.37	0	0	0	1.1	0	1	1	124	3.74	0.1	2.75	95	308	0.38	0.5	43	8.19
T19	135	29	174	29	158	131	27.75	16.1704	106	66	45,X（25）/46，XX（25）	3	3	11	0.15	7.46	2.48	4.68	0.19	0.02	16	32	3.33	1.54	1.61	29.24	5.71	13.61	2.01	96.55	3.2	4.51	0	1	0	1.6	-13	1	0	298	4.33	0.89	10.23	73	110	1.78	0.5	68	5.5
T2	64	27	171	26	160	94.7	16.7	18.6216	90	61	45，X	1	2	7.45	0.15	4.67	2.3	1.9	0.51	0.67	10	31	4.33	1.86	2.89	16.4	6.43	11.56	2.22	117.1	3.67	4.23	0	0	0	0.8	-12	2	0	98	3.33	0.1	2.09	73	375	0.7	0.5	63	9.2
T20	60	31	165	27	157	93.5	13.5	15.4422	97	59	45，X	1	1	15.2	0.15	6.91	3.26	3.05	0.51	0.08	14	33	4.19	1.33	2.74	3.02	6.34	11.09	2.13	95.13	2.57	3.69	0	0	0	0	-1	2	2	106	2.06	0.1	2.49	73	395	0.4	0.5	59.6	8.85
T21	77	29	167	26	156	102.8	17.3	16.3704	103	72	45,X	1	1	#NULL!	0.15	#NULL!	#NULL!	#NULL!	#NULL!	#NULL!	16	61	#NULL!	#NULL!	#NULL!	10.34	4.99	14.22	2.03	117.4	3.78	4.11	1	1	0	1	3	1	0	89	2.98	0.1	2.09	73	365	0.78	0.5	29.1	8.45
T22	108	29	160	27	153	112	25	19.9298	99	62	45，X（78）/46，X，idic（X）（P22，31）	3	3	4.6	0.15	7.81	3.11	2.4	0.6	0.7	33	52	5.17	1.98	2.59	97.79	6.51	12.18	2.41	115.62	7.18	4.63	1	0	0	1.4	8	2	0	148	3.21	0.52	13.92	73	126.21	0.54	0.21	61.3	6.375
T3	83	30	169	27	159	102.8	19.5	18.4522	94	59	45，X	1	2	10.34	0.15	5.01	2.17	2.31	0.1	0.13	11	29	4.1	1.6	2.53	30.11	5.78	11.2	2.54	120.1	3.89	5	0	0	0	1.4	-10	2	0	102	3.09	0.1	1.89	87	307	0.34	0.5	104	10.3
T4	63	25	170	27	159	94.2	16.6	18.7071	89	54	45，X	1	2	9.9	0.15	5.12	3.6	1.22	0.2	0.32	12	29	4.55	1.94	2.97	26.44	6.11	13.29	2.61	115.2	3.45	3.55	0	0	0	2	-15	2	0	111	5.11	0.15	1.32	102	331	0.63	0.5	57.9	9.7
T5	55	27	174	26	157	98	15.9	16.5556	100	68	47，XXX(66)/45，X(11)	4	3	10.3	0.15	7.6	4.08	2.09	0.7	0.64	16	40	4.62	1.64	2.79	16.36	5.95	12.61	1.77	87.88	4.86	3.97	1	1	0	0.5	0	1	0	99.7	4.52	0.1	2.94	73	386	0.78	0.5	51.55	6.8
T7	96	26	168	26	160	111	21	17.0441	91	57	45，X（78）/46，X，r（X）（6）	3	2	8.29	0.15	5.89	3.11	1.66	0.12	0.32	17	37	5.45	1.96	2.45	35.1	6.54	11.23	2.62	120	2.45	4.51	0	0	0	0	-6	2	0	211	2.76	0.1	2.04	89	512	0.9	0.5	67	9.43
T8	111	27	171	25	155	107.8	20	17.2105	109	73	45，X[12]/46，XX[38]	3	3	12.55	0.15	8.34	4.5	2.98	0.8	0.71	18	30	5.88	2.01	3.02	78.44	6.11	13.22	2.03	103.4	2.88	4.6	1	0	0	0.4	3	2	0	127	3.01	0.1	1.89	103	499	1.78	0.5	54	6
T9	136	32	170	26	162	131.4	30.2	17.4911	111	76	45,X(27)/46,X,+r(23)	3	2	8.98	0.2	6.48	2.99	2.87	0.53	0.07	17	26	4.85	1.63	2.66	48.77	5.6	13.89	1.83	116.18	17.98	4.26	1	0	1	1.8	-4	2	0	302	4.72	0.3	3.01	73	317	0.45	0.5	37	6.85
[truncated: 7 more columns]

## Sheet: Sheet2Source of variation 1 fat
Source of variation	1 father ；2 mother ；3 parents
Uterine ultrasound result	1low ；2 normal ；3 high
Ovarian ultrasound result	0 Not seen or displayed unclearly；1 small ；2 normal
